1           **Osmoregulation of glutamine synthetase from Giant freshwater**  
2           **prawn (*Macrobrachium rosenbergii*) under osmotic stress**

3           **Zhijie Lu<sup>1,2</sup>, Zhendong Qin<sup>1</sup>, Sarath Babu V<sup>1</sup>, Chengkai Ye<sup>2</sup>, Guomao Su<sup>1</sup>, Jiabo**  
4           **Li<sup>3</sup>, Guang Yang<sup>2</sup>, Haiyang Shen<sup>2</sup>, Gan Pan<sup>2,4\*</sup>, Li Lin<sup>1\*</sup>**

5           <sup>1</sup>Guangdong Provincial Water Environment and Aquatic Products Security Engineering  
6           Technology Research Center, Guangzhou Key Laboratory of Aquatic Animal Diseases  
7           and Waterfowl Breeding, College of Animal Sciences and Technology, Zhongkai  
8           University of Agriculture and Engineering, Guangzhou, Guangdong, 510225, China;

9           <sup>2</sup>Guangdong Provincial Key Laboratory for Healthy and Safe Aquaculture, College of  
10          Life Science, South China Normal University, Guangzhou 510631, China;

11          <sup>3</sup>College of Fisheries, Huazhong Agricultural University, Wuhan, Hubei, 430070,  
12          China;

13          <sup>4</sup>Jin Yang Aquaculture Co. Ltd., Guangzhou 511447, China

14          **Corresponding author:**

15          College of Animal Sciences and Technology, Zhongkai University of Agriculture and  
16          Engineering, Guangzhou, Guangdong, 510225, China, Li Lin: E-mail:  
17          linli@zhku.edu.cn; Guangdong Provincial Key Laboratory for Healthy and Safe  
18          Aquaculture, College of Life Science, South China Normal University, Guangzhou  
19          510631, China, Gan Pan: E-mail:pg2829@sina.com

20

21 **Abstract**

22 Glutamine synthetase is a key enzyme that catalyzes the biosynthesis of glutamine (Gln)  
23 from glutamate and ammonia. Gln a vital amino acid acts as a precursor for protein  
24 synthesis and also assist in ammonia repressor and a key osmoregulators in aquatics.  
25 Here, we report the cloning and characterization of the GS gene from *Macrobrachium*  
26 *rosenbergii* (*Mr*-GS). The complete nucleotide and deduced amino acid sequences were  
27 determined that phylogenetically shared highest identity with other crustaceans. GS  
28 mRNA was differentially expressed in 6 different tissues, with high to low order as  
29 muscle > gills > heart > stomach > brain > haemolymph. *Mr*-GS expression and the  
30 glutamine concentrations were analyzed in the gills and muscle tissues of prawn under  
31 hyper/hypo-osmotic stress conditions. Under hyper-osmotic stress, the mRNA  
32 expression of *Mr*-GS was significantly increased in both gills and muscle at 3, 6 and 12  
33 h post-treatment with 2.54, 4.21 and 10.83 folds, and 11.66, 17.97 and 45.92 folds,  
34 respectively. Protein analysis by western blot (WB) and Immunohistochemistry (IHC)  
35 further confirmed the *Mr*-GS expression was increased at 12 h post treatment. On the  
36 other hand, under hypo-osmotic stress, the mRNA expression of *Mr*-GS was also  
37 significantly increased in both gills and muscle at 3, 6 and 12 h post treatment with  
38 1.63, 3.30 and 3.52 folds, and 4.06, 42.99 and 26.69 folds, respectively. Furthermore,  
39 under hyperosmotic stress, Gln concentration was increased in both gills and muscle at  
40 6 and 12 h post treatment with 1.83, 2.02 folds, and 1.41, 1.29 folds, respectively. While,  
41 under hypo-osmotic stress, Gln concentration was increased in both gills and muscle at  
42 3, 6 and 12 h post treatment with 3.99, 3.40, 2.59 folds, and 1.72, 1.83, 1.80 folds,

43 respectively. Taken together, these results suggest that *Mr*-GS might play a key role in

44 osmoregulation in *M. rosenbergii*.

45

## 46 **Introduction**

47 Giant freshwater prawn (*Macrobrachium rosenbergii*) is one of the world's largest  
48 freshwater cultured crustaceans and has a wide distribution in tropical and subtropical  
49 areas of the world [1, 2]. There have been reported that the prawn could mature and  
50 spawn in the freshwater area [3]. However, they must migrate to the brackish water  
51 with salinity range between 9-19 ‰ for hatching and nursing of the larvae [2, 4]. As a  
52 result of migration, this species exhibits an excellent tolerance to a wide range of  
53 salinity, which is a characteristic of the prawn [5]. There are a number of reports about  
54 the salinity tolerance of the prawn [2, 4-10]. However, the mechanism underlying the  
55 osmoregulation of the prawn remains enigmatic.

56 Glutamine synthetase (GS, EC 6.3.1.2) is an enzyme catalyzes a reaction that  
57 incorporates ammonium into glutamate and generates Glutamine (Gln), i.e., Glutamate  
58 + ATP + NH<sub>3</sub> → Glutamine + ADP + phosphate [11]. The Gln plays crucial roles in an  
59 array of biochemical functions, including protein synthesis, lipid synthesis, cell growth,  
60 energy supply, as well as ammonia carrier [12]. The GS gene has been reported in many  
61 species which included not only vertebrate species such as Chinese hamster [13],  
62 chicken [14] and human [15], but also invertebrate species like *Procambarus clarkii*  
63 [16], *Crassostrea gigas* [17], *Fenneropenaeus chinensis* [12] and *Litopenaeus*  
64 *vannamei* [18]. However, up to date, there is no information about the GS gene of *M.*  
65 *rosenbergii*. Previous studies had mainly focused on salinity-related changes in oxygen  
66 consumption, ammonia excretion, and ion osmoregulation in *M. rosenbergii* [5]. There  
67 have been reported that with the increase of water salinity, the levels of some free amino

68 acid (FAA), including glycine, proline, arginine, glutamate, and alanine in the tissues  
69 and haemolymph also raised in *M. rosenbergii* and *M. nipponense* species [19, 20], due  
70 to the catabolism of proteins and amino acids (AA) [21]. Ammonia which is toxic for  
71 aquatic animals and it must be catalyzed into Gln with the effort of GS enzyme as a  
72 nontoxic transporter in the haemolymph circulation [22].

73 Once the crustaceans were stressed by various environmental factors, GS  
74 expression and the concentration of Gln were found to be increased, illustrating that GS  
75 plays an essential role in environmental stress resistance and adaptation [12, 23].  
76 Furthermore, Gln as a transporter of ammonia in the haemolymph provides an abundant  
77 FAA as osmolytes that further utilized by other cells or protein synthesis [18, 20]. Since  
78 the gills is a vital tissue for osmoregulation and the muscle is the largest storehouse of  
79 protein and amino acid for providing energy, therefore, we focused our studies on gills  
80 and muscle in this report. We have cloned a GS gene from *M. rosenbergii* (*Mr-GS*),  
81 and the osmoregulation of the GS was characterized under osmotic stress.

## 82 **Materials and methods**

### 83 **Experimental design and samples collection**

84 Adult *M. rosenbergii* (approximately 12-15 g) were obtained from Jin Yang  
85 Aquaculture Co. Ltd., Guangzhou, China. First of all, the prawns were acclimatized to  
86 freshwater in the tank at 25 °C for at least one week before experiments. The prawns  
87 were cultured in freshwater and used as negative control. For hyper-osmotic stress  
88 treatment, some of the prawns were shifted directly into brackish water with 13 ‰  
89 salinity. For hypo-osmotic stress treatment, the prawns which have been adapted to the

90 water with 13 ‰ were shifted directly to freshwater. The tissues from six individuals  
91 were sampled for the RNA extraction at 0, 3, 6, and 12 h post the stress treatment. The  
92 samples of the gills and muscle were frozen immediately in liquid nitrogen for western-  
93 blot analysis, while part of them was instantly fixed and processed for  
94 immunohistochemistry (IHC).

### 95 **RNA isolation, cDNA synthesis and gene cloning of Mr-GS**

96 The total RNA from the various samples were extracted using RNAiso plus (TaKaRa,  
97 Dalian, China) and the first-strand cDNA was synthesized using HIScript<sup>®</sup> Q Select RT  
98 SuperMix for qPCR (Vazyme, Nanjing, China) according to the manufacturer's  
99 instructions. Specific primers was designed based on the sequences of the GS gene  
100 identified from the *M. rosenbergii* transcriptomic data in our laboratory (unpublished  
101 data), so as to amplify the complete open reading frame ORF of *Mr-GS*. All used  
102 primers were shown in [Table 1](#). PCR amplification was performed under the following  
103 conditions: pre-denaturation at 95 °C for 5 min, followed by 35 cycles of 95 °C for 10  
104 s, 55 °C for 30 s and 72 °C for 1 min, post extension at 72 °C for 10-min and finally  
105 kept at 4 °C. The amplified specific PCR products were electrophoresed on 1% agarose  
106 gels, and the target products were purified with a TaKaRa Agarose Gel DNA  
107 Purification KitVer.2.0 (TaKaRa, Japan). The purified DNA fragments were ligated  
108 into the pET-32a (+) plasmid (TaKaRa, Japan) and transformed into competent  
109 *Escherichia coli* DH5 $\alpha$  cells. Positive clones containing inserts of the expected size  
110 were sequenced using M13 primers and sequenced at Invitrogen, Shanghai.

111

112 **Table 1.** Primers used in the present study

113

| Primers name                      | Sequences (5' - 3')            | Purpose             |
|-----------------------------------|--------------------------------|---------------------|
| <b>GS-F1</b>                      | CTTCGCATCCCAGGAGGAATT          | RT-PCR              |
| <b>GS-R1</b>                      | GGACAGCTGGAACATCTCCTT          | RT-PCR              |
| <b>GS-F2</b>                      | CGCGGATCCCTTCGCATCCCAGGAGGAATT | Recombinant plasmid |
| <b>GS-R2</b>                      | CCCAAGCTTGGACAGCTGGAACATCTCCTT | Recombinant plasmid |
| <b>GS-F3</b>                      | AGCCTGCCTCTACACTGGTA           | qRT-PCR             |
| <b>GS-R3</b>                      | TGACGCCGAAATCTTCAGCT           | qRT-PCR             |
| <b><math>\beta</math>-actin-F</b> | GTCGTGACTTGACCGATTACCT         | qRT-PCR             |
| <b><math>\beta</math>-actin-R</b> | ATCTCCTGCTCGAAGTCCAATG         | qRT-PCR             |

114

### 115 **Sequence and phylogenetic analysis of Mr-GS**

116 The full-length AA sequence of *Mr*-GS ORF and protein domains were predicted by  
117 Emboss (<http://emboss.Bioinformatics/>) and SMART (<http://smart.embl-heidelberg.de>)  
118 tools. The sequences similarity was analyzed by the BLAST program  
119 (<http://www.ncbi.nlm.nih.gov/blast>). Multiple sequence alignments were performed by  
120 Clustal X 2.0 program, and the breakpoints analyses were further determined by  
121 DNAMAN software package (Lynnon Biosoft, Canada). The phylogenetic tree was  
122 constructed based on the ORF AA sequences of *Mr*-GS proteins by MEGA 6.0 software  
123 with the neighbor-joining (NJ) method with 1000 bootstraps replications.

### 124 **Quantitative real-time PCR (qRT-PCR) assay and data analysis**

125 The expression pattern of *Mr*-GS in various tissues at different time points was studied  
126 using qRT-PCR in Roche LightCycler 480 (Roche, USA). All used primers were  
127 presented in Table 1, where  $\beta$ -actin was used as an internal reference gene. The qRT-  
128 PCR was conducted using AceQ® qPCR SYBR® Green Master Mix (Vazyme, Nanjing,  
129 China). The reaction was performed in a final volume of 20  $\mu$ l, containing 1  $\mu$ l cDNA,  
130 10  $\mu$ l AceQ® qPCR SYBR® Green Master Mix, 1  $\mu$ l each specific primer, and 7  $\mu$ l

131 ddH<sub>2</sub>O under following conditions: 95 °C for 3 min, followed by 40 cycles of 95 °C for  
132 15 s, 60 °C for 30 s and 72 °C for 20 s, finally at 4 °C for 5 min on. The relative expression  
133 ratio of the target genes versus β-actin gene was calculated using 2<sup>-ΔΔCT</sup> method [24].  
134 Each sample was measured at least triplicate, and all data were presented as mean ±  
135 standard deviation (SD). Significant differences between samples were analyzed by  
136 one-way analysis of variance (ANOVA) in GraphPad Prism 7. The difference was  
137 considered significant,  $P < 0.05$  (\*),  $P < 0.01$  (\*\*) or not significant,  $P > 0.05$  (NS).

### 138 **Western-blot assay**

139 Total protein from the lysates of frozen gills and muscle tissues were prepared by  
140 homogenization as described [25]. Briefly, the tissue samples were weighed and  
141 homogenized three times in 5 volumes (w/v) of ice-cold extraction buffer containing  
142 50 mM imidazole (pH 7.0), 1 mM EDTA, 25 mM NaF, and 1 mM PMSF. Subsequently,  
143 sonicated for 30 s and centrifuged at 10,000 × *g* at 4 °C for 10 min. The protein  
144 concentrations were determined according to the method of Bradford Protein Assay Kit  
145 (Beyotime, Shanghai, China). The total protein (about 50 μg) was separated in an SDS-  
146 PAGE (10 %) and transferred onto nitrocellulose membrane (Bio-Rad, America). The  
147 membranes were blocked with TBST (137 mM NaCl, 20 mM Tris, 1 % Tween-20, pH  
148 7.6) containing 5 % skim fat milk at room temperature (RT) for 1 h. Then the  
149 membranes were incubated at 4 °C overnight with the rabbit *anti-Mr-GS* (1/1000  
150 dilution) primary antibody which was prepared in our laboratory. Subsequently, the  
151 membranes were washed three times for 5 min with TBST and incubated with HRP-  
152 conjugated secondary antibody of goat *anti-rabbit IgG* (1/10,000 dilution). The



153 membranes were incubated for 1 h and then washed thrice for 5 min with TBST. The  
154 immunoreactive bands were revealed by chemiluminescence (ECL Western Blotting  
155 Substrate, Solarbio, Beijing, China) and measured by using ChemiScope 6000 (ClnX,  
156 Shanghai, China).

### 157 **Immunohistochemistry assay**

158 The IHC assay was performed as previously described [26]. In brief, both the gill and  
159 muscle tissues were fixed with 4 % paraformaldehyde for 24 h at 4 °C, and then paraffin-  
160 embedded samples were cut into 4- $\mu$ m sections and baked at 60 °C for 2 h. Sections  
161 adhered to slides were deparaffinized with xylene and rehydrated, submerged into  
162 EDTA antigenic retrieval buffer and microwaved for antigenic retrieval for 15 min.  
163 Later, the sections were treated with 3 % hydrogen peroxide (H<sub>2</sub>O<sub>2</sub>) in methanol,  
164 followed by incubation with 1 % bovine serum albumin (BSA) to block nonspecific  
165 binding at RT for 1 h. Then the tissue sections were incubated with the primary antibody  
166 rabbit *anti-Mr-GS* (1/200 dilution) overnight at 4 °C. After washing thrice with TBST,  
167 slides were incubated with HRP-conjugated goat *anti-rabbit IgG* (1/1000 dilution) at  
168 RT for 1 h and developed with DAB substrate solution (Guge Biotech, China). Finally,  
169 the sections were counterstained with hematoxylin, mounted and photographed  
170 (ECLIPSE E100, Nikon).

### 171 **Determination of Glutamine concentration**

172 Frozen gills and muscle tissues were processed and measured using shrimp Glutamine  
173 ELISA Kit (Kawanshu, Shanghai, China) following manufacturer instruction. Briefly,  
174 to the microwells previously coated with *anti-Gln* antibodies, samples, standards, and

175 HRP-labeled detection antibodies were sequentially added with appropriate incubations  
176 and washing. Tetramethylbenzidine (TMB) was added to each microplate wells to form  
177 a final yellow color from blue by the catalysis of peroxidase. The absorbance was  
178 measured at a wavelength of 450 nm using a microplate reader (Molecular Devices,  
179 USA), the intensity of color was measured.

## 180 **Results**

### 181 **Sequence and phylogenetic analysis of *Mr*-GS**

182 The full-length cDNA transcript of *Mr*-GS was 1965 bp with a 76 bp at 5'-untranslated  
183 region (UTR), an 803 bp 3'-UTR containing a 13 bp poly (A) tail. Nucleotide sequence  
184 analysis showed that the ORF of 1086 bp which encoded a putative protein of 361 AA  
185 with estimated molecular weight (MW) of 40.75 kDa (Fig 1A). SMART analysis  
186 displayed that *Mr*-GS protein contained two catalytic domains of Gln-synt\_N located  
187 at N-terminal region at about 21-101 bp and Gln-synt\_C located at C-terminal region  
188 at 107-356 bp (Fig 1B).

189 **Fig 1. The sequence analysis of *Mr*-GS.** (A) The full-length cDNA sequence and  
190 deduced amino acid sequence of *Mr*-GS. The ORF of the nucleotide sequence was  
191 shown in lowercase, while the 5' and 3'-UTR sequences were shown in upper-case  
192 letters. The two potential *Mr*-GS binding domains were underlined in black. (B)  
193 Architecture and location representation of two characteristic domains of *Mr*-GS.

194 Multiple sequence alignment indicated that the AA ORF sequences of *Mr*-GS  
195 showed 87 % identity to the *Marsupenaeus japonicus* GS (*Mj*-GS), 83 % to *Hyaella*  
196 *azteca* GS (*Ha*-GS), 81 % to *Pacifastacus leniusculus* GS (*Pl*-GS), 79 % to *Daphnia*

197 *magna* GS (*Dm*-GS), 71 % to *Danio rerio* GS (*Dr*-GS), and 70 % identity to the *Homo*  
198 *sapiens* GS (*Hs*-GS) (Fig 2). The results suggested that GS proteins were highly  
199 conserved from invertebrates to vertebrates, and multiple alignments discovered five  
200 conserved regions within *Mr*-GS. Besides, the phylogenetic tree demonstrated that GS  
201 genes were separated into two groups consisting of invertebrate and vertebrate. The  
202 invertebrates included crustacean, insecta, arachnida, and merostomata, and the  
203 vertebrates contained actinopterygii and mammals, correlating well with the  
204 evolutionary origins. As shown in Fig 3, the GS of *M. rosenbergii* were clustered with  
205 *Litopenaeus vannamei*, *Marsupenaeus japonicus*, *Fenneropenaeus chinensis*, *Penaeus*  
206 *monodon*, *Hyaella azteca*, *Procambarus clarkii*, *Pacifastacus leniusculus* and *Daphnia*  
207 *magna* together into the crustacean group.

208 **Fig 2. Analysis of protein sequences across species.** Five conserved regions were  
209 marked with I : the latch (F/Y-D-G-S-S), II : (G-X(8)-E/K-V-X(3)-Q-W-E), III : ATP-  
210 binding site (K-P-X(4,5)-N-G-A-G-X-H-T-H-T-N-X-S), IV : Glutamate binding site  
211 (N/S-R-X(3)-I-R-I-P-R), and V : (F/L-E-D-R-X-P-S-X-N-X-D-P-Y), respectively.  
212 Multiple-sequence alignment of *M. rosenbergii* (*Mr*-GS) with *Dr*-GS, *Danio rerio* GS  
213 (NP 878286.3); *Dm*-GS, *Daphnia magna* GS (KZS15608.1); *Ha*-GS, *Hyaella azteca*  
214 GS (XP 018023652.1); *Pl*-GS, *Pacifastacus leniusculus* GS (AFV39702.1); *Hs*-GS,  
215 *Homo sapiens* GS (NP 001028216.1); *Mj*-GS, *Marsupenaeus japonicus* GS  
216 (AWW43688.1).

217 **Fig 3. Phylogenetic analysis of full-length amino acid sequences of *Mr*-GS.** The  
218 diagram was generated by the neighbor-joining method using the MEGA 6.0 program.

219 Numbers next to the branches represent the percentage of replicate trees in the bootstrap  
220 replication (1,000). Bar scale at the bottom indicates 5 % amino acid divergence. The  
221 analysis involved 20 amino acid sequences including *Macrobrachium rosenbergii*  
222 (marked with a triangle); *Litopenaeus vannamei* (AEO80035.1); *Marsupenaeus*  
223 *japonicus* (AWW43688.1); *Fenneropenaeus chinensis* (AFN66649.1); *Penaeus*  
224 *monodon* (AGA83299.1); *Hyaella azteca* (XP 018023652.1); *Procambarus clarkii*  
225 (AKN79748.1); *Pacifastacus leniusculus* (AFV39702.1); *Daphnia magna*  
226 (KZS15608.1); *Halyomorpha halys* (XP 014294596.1); *Leptinotarsa decemlineata* (XP  
227 023022227.1); *Anoplophora glabripennis* (XP 018567831.1); *Anopheles darlingi*  
228 (ETN61772.1); *Centruroides sculpturatus* (XP 023214668.1); *Limulus polyphemus*  
229 (XP 013778191.1); *Parasteatoda tepidariorum* (XP 015929268.1); *Danio rerio* (NP  
230 878286.3); *Homo sapiens* (NP 001028216.1); *Bos taurus* (AAI03100.1); *Mus musculus*  
231 (AAA37746.1); *Rattus norvegicus* (NP 058769.4).

### 232 **Tissue distribution and mRNA expression profiles of Mr-GS**

233 GS gene expression in the control group (non-stress treated prawn) was analyzed by  
234 qRT-PCR. The level of the *Mr-GS* mRNA could be detected in all tested tissues,  
235 organized from high to low expression levels as muscle> gills> heart> stomach> brain >  
236 haemolymph (Fig 4).

237 **Fig 4. Tissue distribution analysis of *Mr-GS* in non-salinity stress of *M. rosenbergii***  
238 **by qRT-PCR.** Relative expression levels of *Mr-GS* in the gill, muscle, stomach, heart,  
239 brain, and hemolymph,  $\beta$ -actin as an internal control gene.

240 In response to hyperosmotic stress (0→13 ‰), the expression of the mRNA levels

241 were found to be increasingly up-regulated both in the gills and muscles in a timely  
242 manner. Compared to that of 0 h, the mRNA expression was significantly increased in  
243 the gills with 2.54, 4.21, and 10.83 folds at 3, 6 and 12 h post of the treatment (Pt).  
244 While it was also considerably increased in the muscles with 11.66, 17.97, and 45.92  
245 folds at 3, 6 and 12 h Pt (Fig 5A). On the other hand, under the hypo-osmotic stress  
246 (13→0 ‰), compared to that of 0 h, the mRNA expression was significantly increased  
247 in the gills with 1.63, 3.30, and 3.52 folds at 3, 6 and 12 h Pt. While it was also increased  
248 dramatically in the muscles with 4.06, 42.99, and 26.69 folds at 3, 6 and 12 h Pt (Fig 6  
249 A).

#### 250 **Western blotting and Immunohistochemistry analyses**

251 To further investigate the function of GS protein in osmoregulation in *M. rosenbergii*,  
252 we evaluated the GS protein expression levels in gill and muscle tissues. Compared  
253 with that at 0 h, the results showed that the expression of *Mr*-GS protein was  
254 considerably up-regulated in both the gills and muscle at 12 h Pt (Fig 5B, 6B).  
255 Furthermore, the same tissue samples were subjected to the IHC assay. The results  
256 showed a similar tendency of protein expression levels with that of the western blotting  
257 in both the muscle and gill tissues (Fig 5B, 6B).

258 **Fig 5. Expression levels of *Mr*-GS exposed to hyperosmotic stress.** (A) Relative  
259 mRNA expression levels of *Mr*-GS exposed to hyperosmotic stress at 0, 3, 6, and 12 h  
260 in the gill and muscle, with  $\beta$ -actin as an internal gene. These results are means  $\pm$  SD.  
261 \* $p$ <0.05, \*\* $p$ <0.01 versus control. (B) Relative expression levels of *Mr*-GS protein  
262 levels exposed to hyperosmotic stress in gill and muscle, detected by western blot

263 analysis,  $\beta$ -actin as control, and immunohistochemistry of gill and muscle tissues at 0  
264 and 12 h. Bars: 5  $\mu$ m.

265 **Fig 6. Expression levels of *Mr*-GS exposed to hypoosmotic stress.** (A) Relative  
266 mRNA expression levels of *Mr*-GS exposed to hypoosmotic stress at 0 h, 3 h, 6 h and  
267 12 h in the gill and muscle, with  $\beta$ -actin as an internal gene. These results are means  $\pm$   
268 SD. \* $p$ <0.05, \*\* $p$ <0.01 versus control, ns = non-significant. (B) Relative expression  
269 levels of *Mr*-GS protein levels exposed to hyperosmotic stress in gill and muscle,  
270 detected by western blot analysis,  $\beta$ -actin as control, and immunohistochemistry of gill  
271 and muscle tissues at 0 and 12 h. Bars: 5  $\mu$ m.

#### 272 **Changes of Gln concentration**

273 There have been shown that Gln played a crucial role in osmoregulation; therefore, we  
274 analyzed the Gln concentration in the gill and muscle of the prawns. Compared to that  
275 of 0 h, in response to hyperosmotic stress, Gln concentration was almost increased in  
276 both gills and muscle at 3, 6 and 12 h post treatment with 0.49, 1.83, 2.02 folds, and  
277 1.16, 1.41, 1.29 folds, respectively. While, under hypo-osmotic stress, Gln  
278 concentration was increased in both gills and muscle at 3, 6 and 12 h post treatment  
279 with 3.99, 3.40, 2.59 folds, and 1.72, 1.83, 1.80 folds respectively (Fig 7).

280 **Fig 7. Change folds of Glutamine concentrations in the *M. rosenbergii* under**  
281 **hyperosmotic stress.** (A) and hypoosmotic stress (B) at 3, 6 and 12 h in the gills and  
282 muscles. These results are means  $\pm$  SD.

#### 283 **Discussion**

284 In the present study, we firstly cloned the glutamine synthetase (*Mr*-GS) of *M.*

285 *rosenbergii*, then evaluated its roles in osmoregulation under osmotic stress. There are  
286 two catalytic domains, named Gln-synt\_N and Gln-synt\_C in *Mr*-GS, which are  
287 essential for the activity of GS. Multiple sequence alignment indicated that *Mr*-GS  
288 proteins were highly conserved with five conserved regions that are present from  
289 invertebrates to vertebrates [18]. Up to date, there are three types of the cytosolic GS  
290 gene. GS I and III located mostly in prokaryotes, and GS II was identified from  
291 eukaryotes [12, 27]. In this report, *Mr*-GS belonged to the GS II. A phylogenetic tree  
292 showed that it has a close association with other crustacean groups GS gene. Besides,  
293 in the present study, the GS proteins were separated into six clades including the  
294 crustaceans, insecta, arachnida, merostomata, actinopterygii, and mammalian groups,  
295 which was consistently correlated with the evolutionary origin of GS.

296 The mRNA transcripts of *Mr*-GS could be detected in all examined tissues and  
297 indicated that GS is a widely distributed enzyme, this was also observed in other species  
298 such as *Litopenaeus vannamei* [4] and *Fenneropenaeus chinensis* [12]. There has been  
299 reported that more energy was required to maintain the body metabolic balance and  
300 osmoregulation when the shrimps were exposed to salinity stress [28, 29]. It is also  
301 stated that crustaceans increase their oxygen consumption, respiratory quotient and  
302 enhance the protein catabolism rate to maintain energy consumption to resist  
303 environmental stresses [18, 28, 29]. Muscle tissue is the largest storehouse of protein  
304 and AA in prawns [14]. During the stress, due to the more active catabolism of protein  
305 and AA, the ammonia concentration usually raised in the tissues, resulting in the  
306 toxicity to the host. Therefore, the extra ammonia must be secreted to the water or

307 converted to glutamine [18, 21]. Our results indicated that during the stress exposure,  
308 *Mr*-GS expression levels had significantly increased in the gills and muscles at various  
309 time points. This might relate to the conversion of ammonia which is catalyzed by GS.  
310 Previous reports proposed that the ammonia formed during catalysis of AA in aquatic  
311 crustacean is mainly transported to gills and excreted as free ammonia by diffusion [30,  
312 31]. Increased expression of GS in the gills and digestive tissues of *C. gigas*, and the  
313 protein levels of GS were significantly regulated in the muscles of *Monopterus albus*  
314 when exposed to stress conditions [17, 25]. In this report, the ammonia concentration  
315 in the prawn was not measured, which needs to be investigated in the future. Similar  
316 studies have reported that FAA function as an essential osmoregulators in crustaceans  
317 such as *Panopeus herbstii* [32], *P. monodon* [33] and *M. nipponense* [20]. In *M.*  
318 *rosenbergii*, the total FAA including glycine, proline, arginine, glutamate, and alanine  
319 concentrations were maintained nearly 1 mM in freshwater; however, it dramatically  
320 increased up to 2.1 mM in higher salinities [19]. Gln has been regarded as one of the  
321 essential osmolytes in *P. motoro* [34], *L. vannamei* [18] and *M. albus* [25]. In summary,  
322 Gln not only performing as a nontoxic transporter of ammonia but also a kind of  
323 abundant FAA and as a major osmolyte for crustaceans.

## 324 **Conclusion**

325 In conclusion, our results revealed significant evidence that *Mr*-GS could be involved  
326 in coordinate osmoregulation in *M. rosenbergii* exposed to osmotic stress. Our results  
327 will shed new light on the osmoregulation of crustacean.



## 328 **Acknowledgments**

329 This work was jointly supported by "Innovation and Strong Universities" special fund  
330 from the Department of Education of Guangdong Province (KA170500G, TK222001G,  
331 KA18058B3, KA1819604). Fund from the Department of Science and Technology of  
332 Guangdong Province (KA1810312), V Sarath Babu was supported by Chinese  
333 Postdoctoral Science Foundation (189103).

## 334 **Author Contributions:**

335 **Conceived and designed the experiments:** Li Lin, Gan Pan. **Performed the**  
336 **experiments:** Zhijie Lu. **Analyzed the data:** Zhendong Qin, Chengkai Ye, Jiabo Li,  
337 Sarath Babu V, Guang Yang, Haiyang Shen, Guomao Su. **Writing:** Zhijie Lu, Sarath  
338 Babu V, Li Lin.

## 339 **References**

- 340 1. New MB. Freshwater prawn farming: global status, recent research and a glance at  
341 the future. *Aquaculture Research*. 2005. 36(3): 210-230.  
342 <https://doi.org/10.1111/j.1365-2109.2005.01237.x>
- 343 2. Huong DTT, Wang T, Bayley M, Phuong NT. Osmoregulation, growth and moulting  
344 cycles of the giant freshwater prawn (*Macrobrachium rosenbergii*) at different  
345 salinities. *Aquaculture Research*. 2010. 41(9): e135-e143.  
346 <https://doi.org/10.1111/j.1365-2109.2010.02486.x>
- 347 3. Tiruvayipati S, Bhassu S. Host, pathogen and the environment: the case of  
348 *Macrobrachium rosenbergii*, *Vibrio parahaemolyticus* and magnesium. *Gut Pathog*.  
349 2016. 8: 15. <https://doi.org/10.1186/s13099-016-0097-1> PMID: 27114742

- 350 4. Chand BK, Trivedi RK, Dubey SK, Rout SK, Beg MM, Das UK. Effect of salinity  
351 on survival and growth of giant freshwater prawn *Macrobrachium rosenbergii* (de  
352 Man). Aquaculture Reports. 2015. 2: 26-33.  
353 <https://doi.org/10.1016/j.aqrep.2015.05.002>
- 354 5. Intanai I, Taylor EW, Whiteley NM. Effects of salinity on rates of protein synthesis  
355 and oxygen uptake in the post-larvae and juveniles of the tropical prawn  
356 *Macrobrachium rosenbergii* (de Man). Comp Biochem Physiol A Mol Integr  
357 Physiol. 2009. 152(3): 372-378. <https://doi.org/10.1016/j.cbpa.2008.11.006> PMID:  
358 19049893
- 359 6. New MB. Status of freshwater prawn farming: a review. aquaculture research. 1995.  
360 26(1): 1-54. <https://doi.org/10.1111/j.1365-2109.1995.tb00859.x>
- 361 7. Wilder NM, Huong DTT, Jasmani S, Jayasankar V, Kaneko T, Aida K, Hatta T,  
362 Nemoto S, Wiggintonc A. Hemolymph osmolality, ion concentrations and calcium  
363 in the structural organization of the cuticle of the giant freshwater prawn  
364 *Macrobrachium rosenbergii*: Changes with the molt cycle. Aquaculture. 2009.  
365 292(1-2): 104-110. <https://doi.org/10.1016/j.aquaculture.2009.03.034>
- 366 8. Franca JL, Pinto MR, Lucena MN, Garcon DP, Valenti WC, McNamara JC, Leone  
367 FA. Subcellular localization and kinetic characterization of a gill (Na<sup>+</sup>, K<sup>+</sup>)-ATPase  
368 from the giant freshwater prawn *Macrobrachium rosenbergii*. J Membr Biol. 2013.  
369 246(7): 529-543. <https://doi.org/10.1007/s00232-013-9565-4> PMID: 23784064
- 370 9. Rezaei TK, Rafiee G, Frinsko M, Daniels H. Comparing Na/K-ATPase activity of  
371 *Macrobrachium rosenbergii* (de Man) larvae at specific developmental stages, using

- 372 different sodium vs potassium and calcium vs magnesium concentrations, and  
373 sodium potassium adsorption ratio (SPAR) mediums. *Aquaculture*. 2017. 479: 619-  
374 625. <https://doi.org/10.1016/j.aquaculture.2017.07.001>
- 375 10. Cheng WT, Liu CH, Cheng CH, Chen JC. Osmolality and ion balance in giant river  
376 prawn *Macrobrachium rosenbergii* subjected to changes in salinity: role of sex.  
377 *Aquaculture Research*. 2003. 34(7): 555-560. [https://doi.org/10.1046/j.1365-](https://doi.org/10.1046/j.1365-2109.2003.00853.x)  
378 2109.2003.00853.x
- 379 11. Eisenberg D, Almassy RJ, Janson CA, Chapman MS, Suh SW, Cascio D, Smith  
380 WW. Some evolutionary relationships of the primary biological catalysts glutamine  
381 synthetase and RuBisCO. *Cold Spring Harb Symp Quant Bio*. 1987. 52: 483–490.  
382 <https://doi.org/10.1101/SQB.1987.052.01.055> PMID: 2900091
- 383 12. Lai XF, Gao H, Kong J, Wang QY, Wang WJ, Meng XH. Cloning and  
384 characterization of the glutamine synthetase gene from Chinese shrimp  
385 *Fenneropenaeus chinensis*. *Aquaculture International*. 2011. 19: 873-889  
386 <https://doi.org/10.1007/s10499-010-9407-7>
- 387 13. Hayward BE, Hussain A, Wilson RH, Lyons A, Woodcock V, McIntosh B, Harris  
388 TJ. The cloning and nucleotide sequence of cDNA for an amplified glutamine  
389 synthetase gene from the Chinese hamster. *Nucleic Acids Res*. 1986. 14(2): 999-  
390 1008. <https://doi.org/10.1093/nar/14.2.999> PMID: 2868445
- 391 14. Marangos C, Brogren CH, Alliot E, Ceccaldi, HJ. The Influence of water salinity on  
392 the free amino acid concentration in muscle and hepatopancreas of adult shrimps,  
393 *Penaeus japonicus*. *Biochemical Systematics and Ecology* 1989. 17(7): 589-594.

- 394 [https://doi.org/10.1016/0305-1978\(89\)90104-X](https://doi.org/10.1016/0305-1978(89)90104-X)
- 395 15. Gibbs CS, Campbell KE, Wilson RH. Sequence of a human glutamine synthetase  
396 cDNA. *Nucleic Acids Res.* 1987. 15(15): 62-93.  
397 <https://doi.org/10.1093/nar/15.15.6293> PMID: 2888076
- 398 16. McKinnon E, Hargittai PT, Grossfeld RM, Lieberman EM. Glutamine cycle  
399 enzymes in the crayfish giant nerve fiber: implications for axon-to-glia signaling.  
400 *Glia.* 1995. 14(3): 198-208. <https://doi.org/10.1002/glia.440140305> PMID: 7591031
- 401 17. Tanguy A, Boutet I, Moraga D. Molecular characterization of the glutamine  
402 synthetase gene in the Pacific oyster *Crassostrea gigas*: expression study in response  
403 to xenobiotic exposure and developmental stage. *Biochim Biophys Acta.* 2005.  
404 1681(2-3): 116-125. <https://doi.org/10.1016/j.bbaexp.2004.10.010> PMID:  
405 15627503
- 406 18. Liu HY, Sun WW, Tan BP, Chi SY, Dong XH, Yang QH. Molecular cloning and  
407 expression of hepatopancreas glutamine synthetase in the Pacific white shrimp,  
408 *Litopenaeus vannamei*, induced by acute hypo-osmotic stress. *Aquaculture.* 2012.  
409 362-363: 80-87. <https://doi.org/10.1016/j.aquaculture.2012.07.031>
- 410 19. Huong DT, Yang WJ, Okuno A, Wilder MN. Changes in free amino acids in the  
411 hemolymph of giant freshwater prawn *Macrobrachium rosenbergii* exposed to  
412 varying salinities: relationship to osmoregulatory ability. *Comp Biochem Physiol A*  
413 *Mol Integr Physiol.* 2001.128(2): 317-326. [https://doi.org/10.1016/S1095-](https://doi.org/10.1016/S1095-6433(00)00310-X)  
414 [6433\(00\)00310-X](https://doi.org/10.1016/S1095-6433(00)00310-X) PMID: 11223393
- 415 20. Wang WN, Wang AL, Bao L, Wang JP, Liu Y, Sun RY. Changes of protein-bound

- 416 and free amino acids in the muscle of the freshwater prawn *Macrobrachium*  
417 *nipponense* in different salinities. *Aquaculture*. 2004. 233(1-4): 561-571.  
418 <https://doi.org/10.1016/j.aquaculture.2003.09.042>
- 419 21. Silvia GJ, Abel Antonio UR, Francisco VO, Georgina HW. Ammonia efflux rates  
420 and free amino acid levels in *Litopenaeus vannamei* postlarvae during sudden  
421 salinity changes. *Aquaculture*. 2004. 233(1-4): 573-581.  
422 <https://doi.org/10.1016/j.aquaculture.2003.09.050>
- 423 22. Liu S, Pan L, Liu M, Yang L. Effects of ammonia exposure on nitrogen metabolism  
424 in gills and hemolymph of the swimming crab *Portunus trituberculatus*. *Aquaculture*.  
425 2014. 432 (20): 351-359. <https://doi.org/10.1016/j.aquaculture.2014.05.029> PMID:  
426 25946713
- 427 23. Wang G, Pan L, Ding Y. Defensive strategies in response to environmental ammonia  
428 exposure of the sea cucumber *Apostichopus japonicus*: Glutamine and urea  
429 formation. *Aquaculture*. 2014. 432: 278-285.  
430 <https://doi.org/10.1016/j.aquaculture.2014.05.006>
- 431 24. Schmittgen TD, Livak KJ. Analyzing real-time PCR data by the comparative C (T)  
432 method. *Nat Protoc*. 2008. 3(6): 1101-1108. <https://doi.org/10.1038/nprot.2008.73>  
433 PMID: 18546601
- 434 25. Tok CY, Chew SF, Peh WY, Loong AM, Wong WP, Ip YK. Glutamine  
435 accumulation and up-regulation of glutamine synthetase activity in the swamp eel,  
436 *Monopterus albus* (Zuiew), exposed to brackish water. *J Exp Biol*. 2009. 212(9):  
437 1248-1258. <https://doi.org/10.1242/jeb.025395> PMID: 19376945

- 438 26. Wu C, Zhao X, S Babu V, Yuan G, Wang W, Su J, Liu X, Lin L. Distribution of  
439 mannose receptor in blunt snout bream ( *Megalobrama amblycephala* ) during the  
440 embryonic development and its immune response to the challenge of *Aeromonas*  
441 *hydrophila*. *Fish & Shellfish Immunology*. 2018. 78: 52-59.  
442 <https://doi.org/10.1016/j.fsi.2018.03.049> PMID: 29627477
- 443 27. Llorca O, Betti M, Gonzalez JM, Valencia A, Marquez AJ, Valpuesta JM. The three-  
444 dimensional structure of an eukaryotic glutamine synthetase: functional implications  
445 of its oligomeric structure. *J Struct Biol*. 2006. 156(3): 469-479.  
446 <https://doi.org/10.1016/j.jsb.2006.06.003> PMID: 16884924
- 447 28. Li E, Chen L, Zeng C, Chen X, Yu N, Lai Q, Qin JG. Growth, body composition,  
448 respiration and ambient ammonia nitrogen tolerance of the juvenile white shrimp,  
449 *Litopenaeus vannamei*, at different salinities. *Aquaculture*. 2007. 265(1-4): 385-390.  
450 <https://doi.org/10.1016/j.aquaculture.2007.02.018>
- 451 29. Xu C, Li E, Liu Y, Wang X, Qin JG, Chen L. Comparative proteome analysis of the  
452 hepatopancreas from the Pacific white shrimp *Litopenaeus vannamei* under long-  
453 term low salinity stress. *J Proteomics*. 2017. 162: 1-10.  
454 <https://doi.org/10.1016/j.jprot.2017.04.013> PMID: 28435106
- 455 30. Chen JC, Chen CT, Cheng SY. Nitrogen excretion and changes of hemocyanin  
456 protein and free amino acid levels in the hemolymph of *Penaeus monodon* exposed  
457 to different concentrations of ambient ammonia-N at different salinity levels. *Mar*  
458 *Ecol Prog Ser*. 1994. 110: 85-89. <https://doi.org/10.3354/meps110085>
- 459 31. Deaton LE. hypoosmotic volume regulation in bivalves: protein kinase C and amino

- 460 acid release. The journal of experimental zoology. 1994. 268: 145-150.  
461 <https://doi.org/10.1002/jez.1402680212>
- 462 32. Boone WR, Claybrook DL. The effect of low salinity on amino acid metabolism in  
463 the tissues of the common mud crab, *Panopeus herbstii* (Milne-Edwards). Comp.  
464 Biochem. Physiol. 1977. 57A: 99-106. [https://doi.org/10.1016/0300-](https://doi.org/10.1016/0300-9629(77)90357-7)  
465 [9629\(77\)90357-7](https://doi.org/10.1016/0300-9629(77)90357-7)
- 466 33. Fang LS, Tang CK, Lee DL, Chen IM. Free amino acid composition in muscle and  
467 hemolymph of the prawn *Penaeus monodon* in different salinities. Nippon Suisan  
468 Gakkaish. 1992. 58(6): 1095-1102. <https://doi.org/10.2331/suisan.58.1095>
- 469 34. Ip YK, Loong AM, Ching B, Tham GHY, Wong WP, Chew SF. The freshwater  
470 Amazonian stingray, *Potamotrygon motoro*, up-regulates glutamine synthetase  
471 activity and protein abundance, and accumulates glutamine when exposed to  
472 brackish (15 ‰) water. Journal of Experimental Biology. 2009. 212(23): 3828-3836.  
473 <https://doi.org/10.1242/jeb.034074> PMID: 19915125

1 **Fig 1.**

2

3

4

(A)

```

1 ACGTGTGCTCTTCCGATCTGGAGCCTTTTGTGACTTCCGATCCAGGAGGAATTTATGCTCAAAGGCTATCAAGatggcatatggaactaataaaaca 100
1 M A Y G T N K T 8
101 gtcttggacagatacctgagacttgaatccctgatcagaatgtcaggctatgtacgtctggtagatggtacaggagagaacctgaggtctaagaca 200
9 V L D R Y L R L E I P D Q K C Q A M Y V W V D G T G E N L R S K T R 42
201 gaactctcaacttcactcccaagagccctagtgaacttcccatctggaactttgacggctcttcaactggacaagctgaaggcagtaacagtacgtgta 300
43 T L N F T P K S P S E L P I W N F D G S S T G Q A E G S N S D V Y 75
GS-synt_N
301 tctgcatccagttgctatctacagagatccttcagacttggtaacaacaaactggttctctgtgaaacctacaatacaacaagaaccactgacacc 400
76 L H P V A I Y R D P F R L G N N K L V L C E T Y K Y N K K P I D I 108
401 aacaaacgatggagctgtctggaagtcatgaaggaggcgaagaacagcctcctgtttggcattggaacaagaatataccctttggatattgacaagc 500
109 N K R W S C L E V M K E A E E Q H P W F G M E Q E Y T L L D I D K H 142
501 accctcttggctggcccaagaagcttaccaggtcccccaggccttactactcgggttaggtgctagcaagtatatggcctgacattgttgaagc 600
143 P L G W P K N G Y P G P Q G P Y Y C G V G A S K V Y G R D I V E A 175
601 tcactacagagcctgctctacactggtattaacattctggagaaaatcctgaggtcctgcccagtggaattccaggtcggcccttgcgaagc 700
176 H Y R A C L Y T G I N I S G E N A E V M P A Q W E F Q V G P C E G 208
701 atcagatgggagatgacctctggatggccagatatactcctccatcggtagctgaagattcggcctcattgtctcactggaccctaagcctattcctg 800
209 I T M G D D L V M A R Y L L H R V A E D F G V I V S L D P K P I P G 242
GS-synt_C
901 caagttccagacaagcaccatcagggcctatgacccccatggaggcaaggacaaacagaggcgtttgactggcctccatgaacctcctcaattcagcag 1000
276 K V H D K H I R A Y D P H G G K D N E R R L T G L H E T S S I H D 308
1001 ttctcagcaggttagccaacagaggagcgtctataagaatccctcgtggcgttgcgaagaaggacaggctacctagaggacctagaccatctcca 1100
309 F S A G V A N R G A S I R I P R G V A E E R T G Y L E D R R P S S N 342
1101 acgcccaccctacgttgtctgagagactgtagcagcactatcctcctgaacagcagcagtagAATGCTGCTGCATATCATGTCATATCATATCAAGGAG 1200
343 A D P Y V V S E R L V R T I C L N E Q * 361
1201 ATGTTCCAGCTGTCCAGAGTACAATTATTGTGTTGTTAGCTAGATATAOCTGTTTCATATGTTATGTGTTCTCACCGGCTATGTCITGCTTGGCTGTAAC 1300
1301 GTGTCCTGATCAGAGCAATGATAAAAAACAGGAACCTGCTCTGGACACACTTAAAAAAAATAGGACTACCTTGTGGTGCACCTGATGAAGAATTAGA 1400
1401 AAATCCTGAGCCTTGTCTTTTAAACAGTTGTTTTATGTTGGCATATACTGTATGCACCTGTTATCTGATGTCACAGTTGCTTTACAGTGCAAAATTATAT 1500
1501 ATATATATATATATOCCAAAGCAAGCTCTTTAGGTTTTGTTTTAAGCAATGCAAGTACATCATAAACAATGTTATTTCTGATTACGCAAAATGTAACA 1600
1601 GTTTTCAAAGTCAATTTACAGGATTATCTATCTTCAAGAAACACATGTTATCTTAATCTCAOCCAAATGTAMCATATGATTTTCATCAOCCACTGCTGATT 1700
1701 CTCTAGTATGGGGTATTTATAOCCATTCTATGTTATGTTTTGTCOOGGTGAAGACTCAAGAGACATGAAMCOGTTTACTTTACAACATATCTTAAT 1800
1801 TAAACACTTGGCTTTCATGCGGACATTCTTTTACACACACACACTCCTCCTCCTTACACAGTGTGTTGTTGATCTTTTTTTTATAAAAAAAT 1900
1901 TTCTCTGATATAAATATTTTATGATAAATATTTCTATAATGGTAATATGAAAAAAAAAAAAA 1965

```

bioRxiv preprint doi: <https://doi.org/10.1101/517409>; this version posted January 10, 2019. The copyright holder for this preprint (which was not certified by peer review) is the author/funder, who has granted bioRxiv a license to display the preprint in perpetuity. It is made available under aCC-BY 4.0 International license.

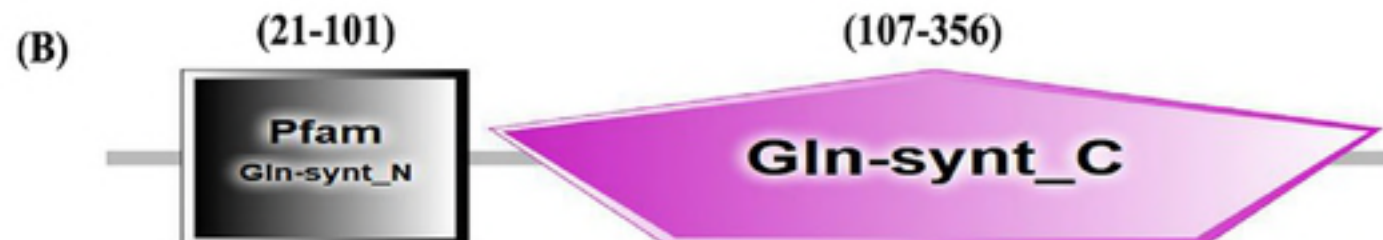

Source: https://www.biorxiv.org/content/10.1101/517409v1.full.pdf
